# Supplementary material for: Synthesis and properties of ionic photoacid generators based on iodonium salts
Source: Royal Society of Chemistry journal article supplement (doi:10.1039/d4re00575a), 2025-01-01
Supplement: d4re00575a1.pdf [file d4re00575a1.pdf]

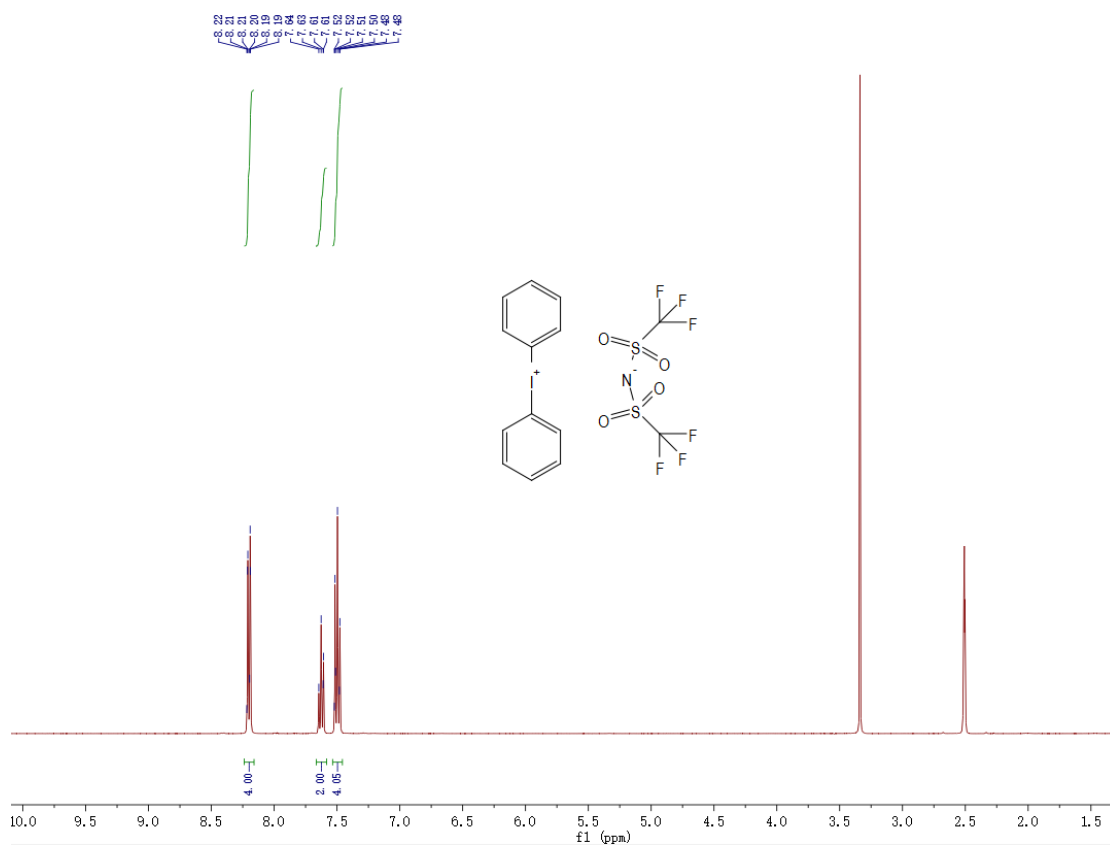

<sup>1</sup>H NMR spectra of PAG1-3a

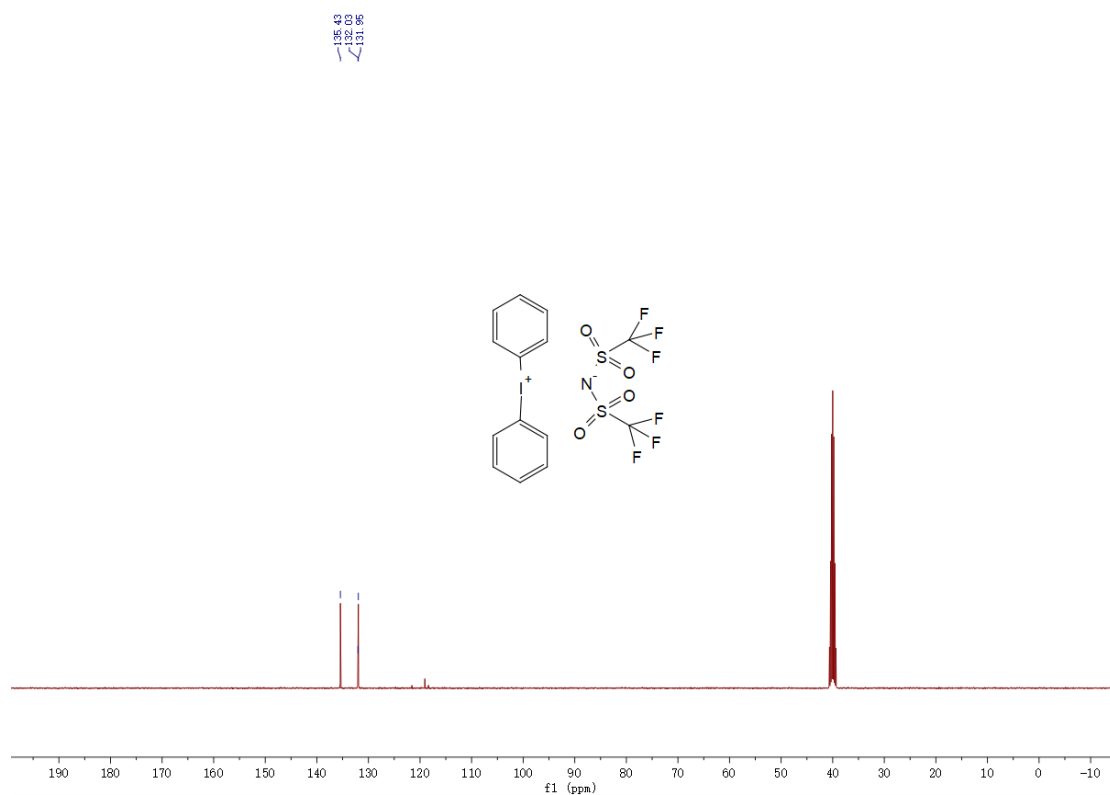

<sup>13</sup>C NMR spectra of PAG1-3a

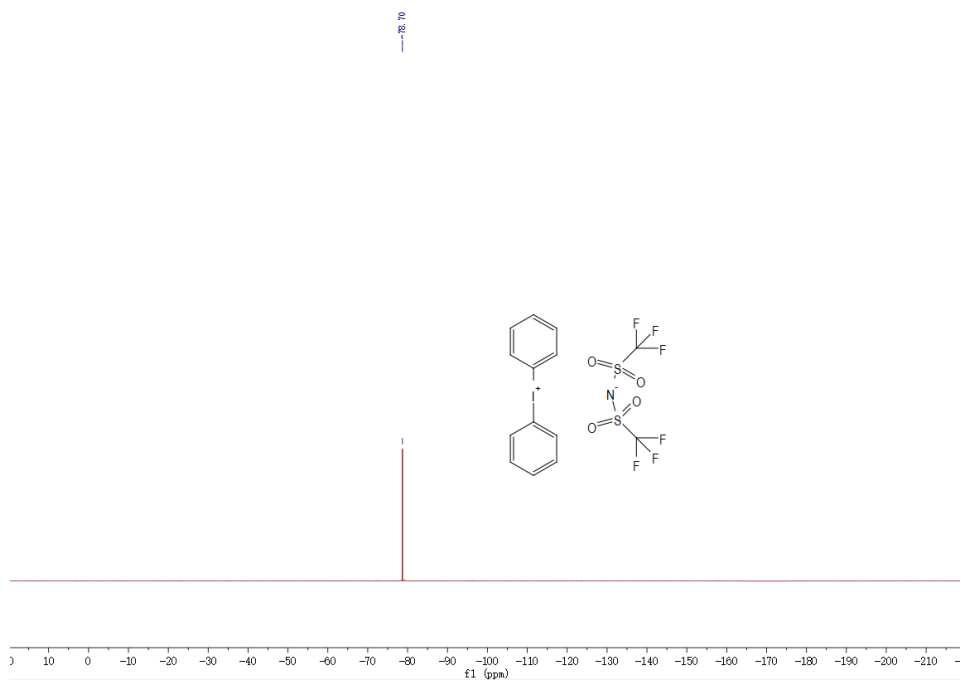

<sup>19</sup>F NMR spectra of PAG1-3a

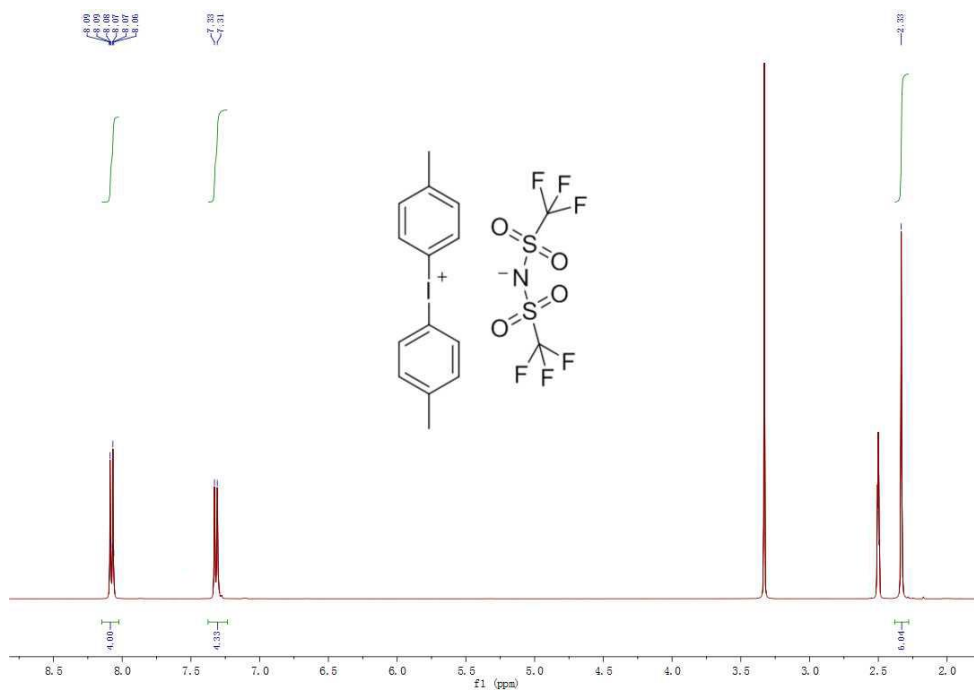

<sup>1</sup>H NMR spectra of PAG2-3a

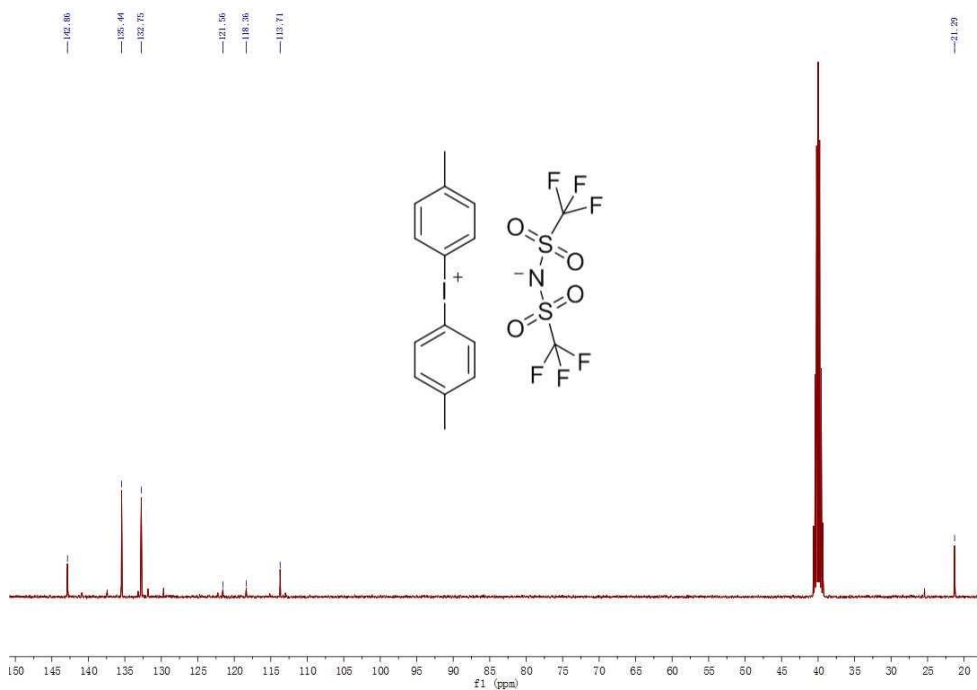

<sup>13</sup>C NMR spectra of PAG2-3a

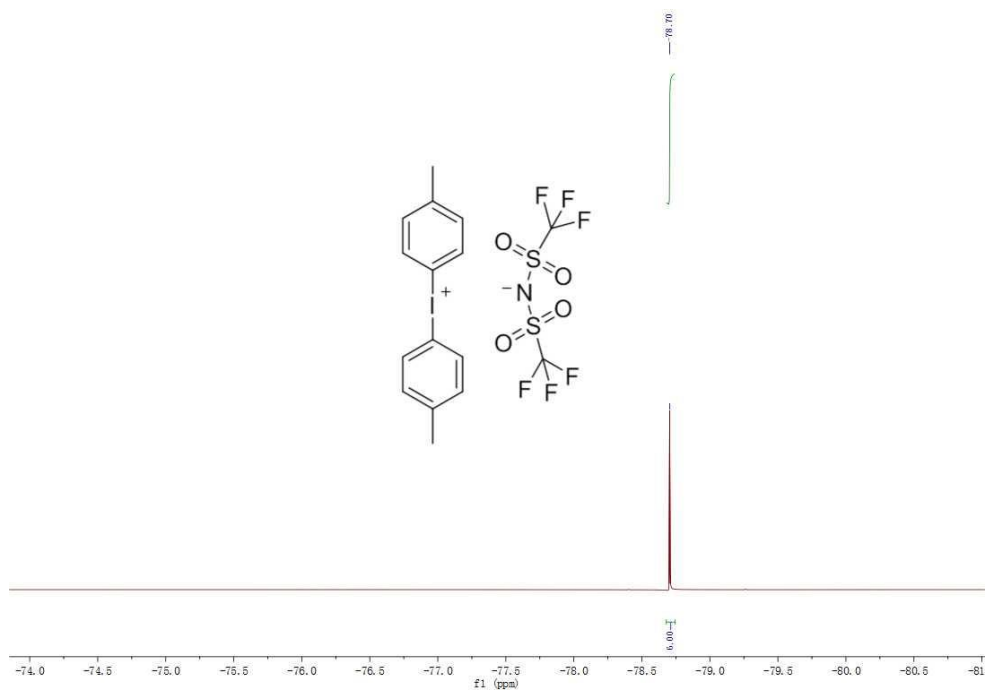

<sup>19</sup>F NMR spectra of PAG2-3a

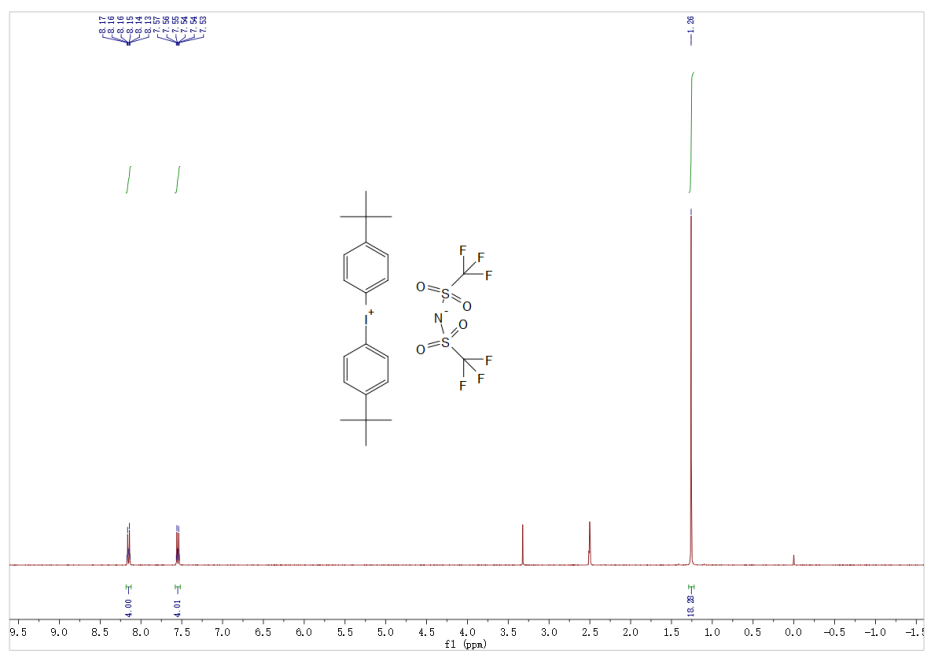

$^1\text{H}$  NMR spectra of PAG3-3a

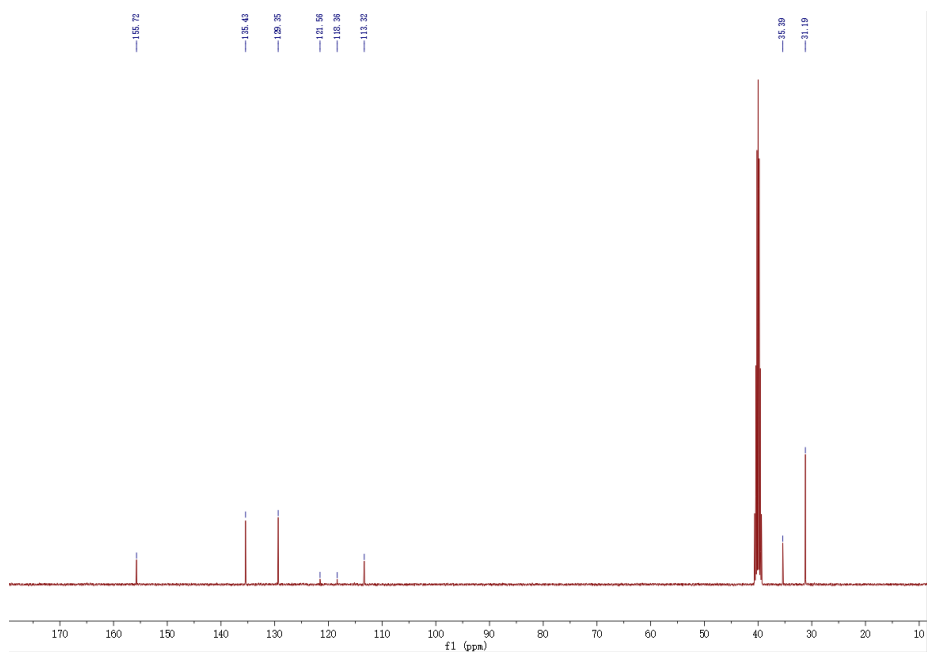

$^{13}\text{C}$  NMR spectra of PAG3-3a

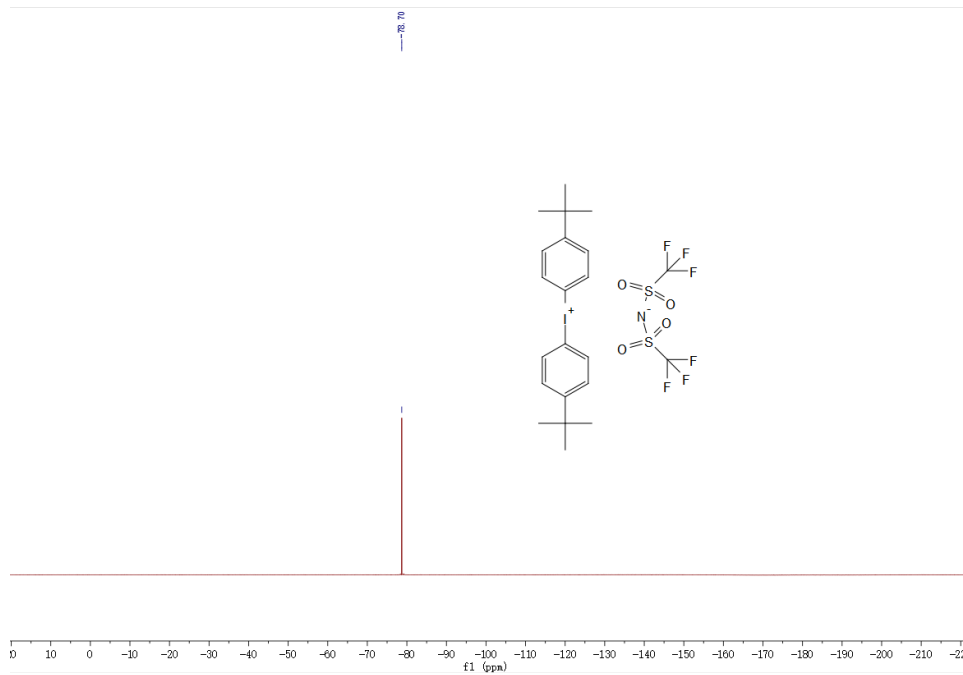

<sup>19</sup>F NMR spectra of PAG3-3a

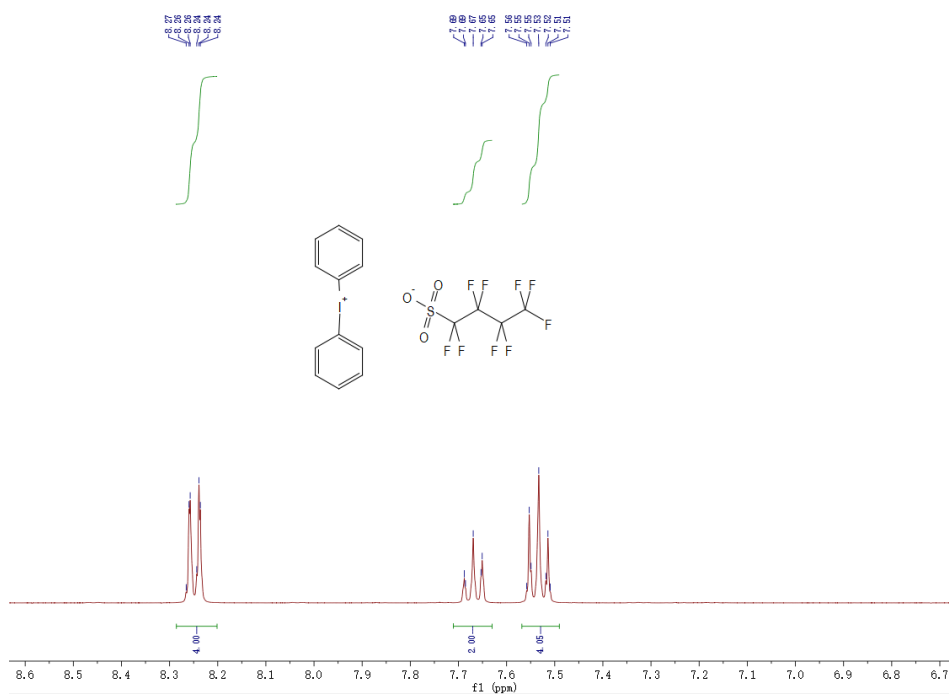

<sup>1</sup>H NMR spectra of PAG1-3b

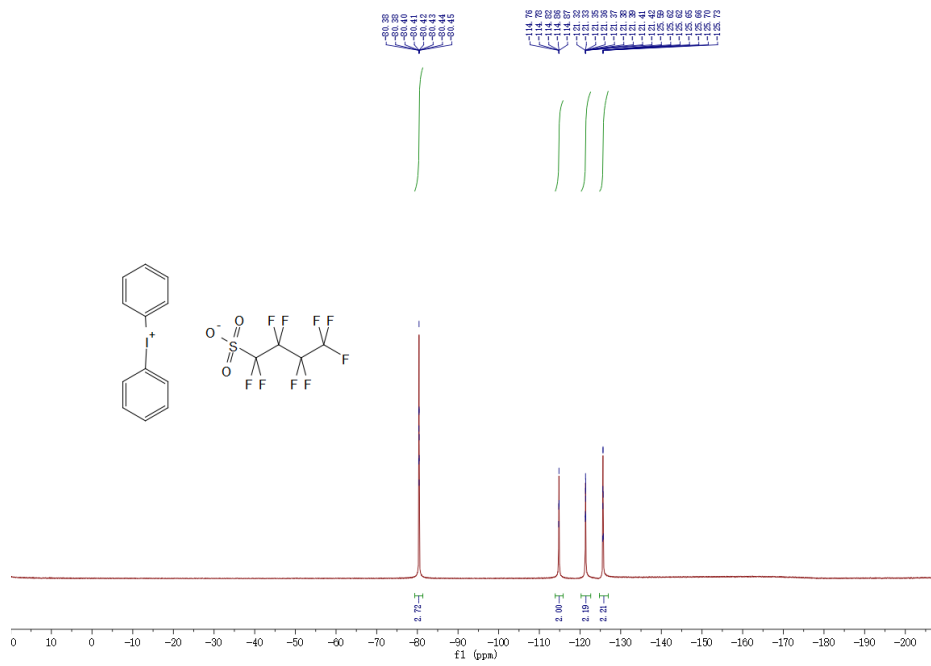

<sup>19</sup>F NMR spectra of PAG1-3b

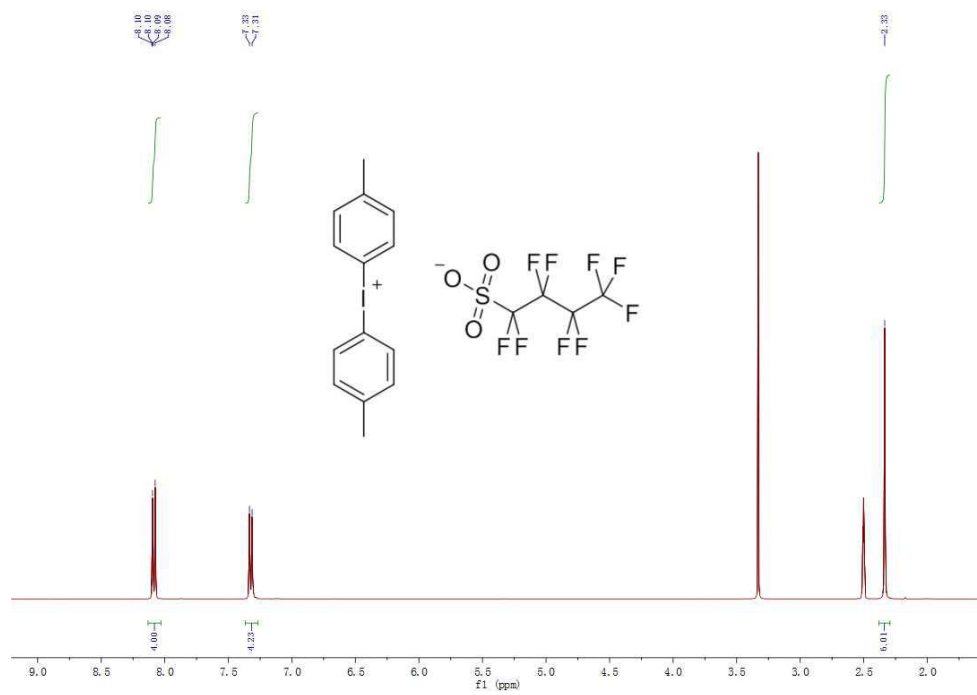

<sup>1</sup>H NMR spectra of PAG2-3b

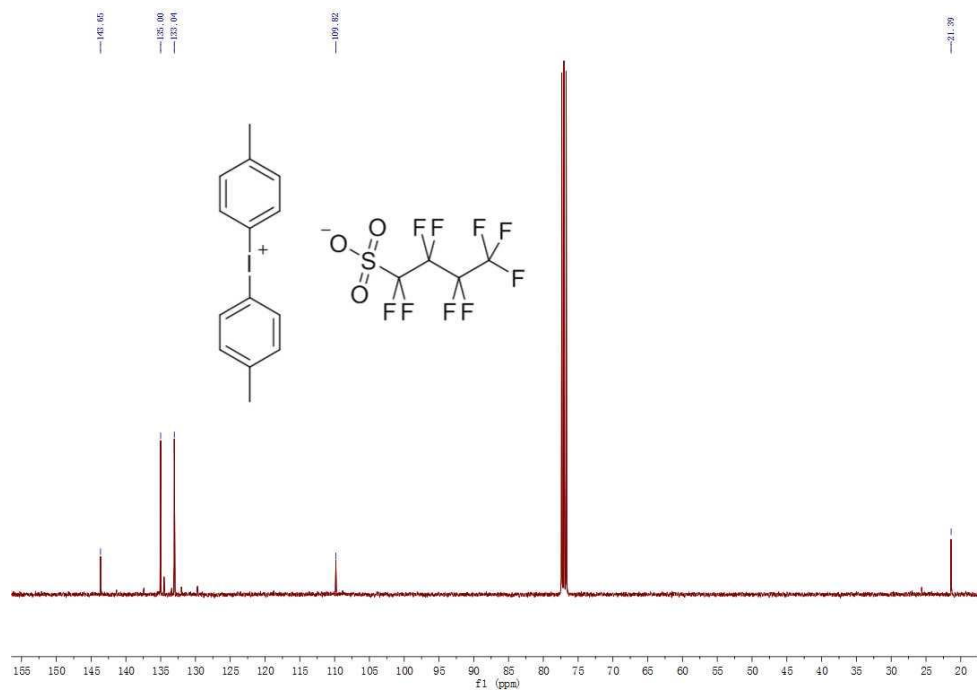

<sup>13</sup>C NMR spectra of PAG2-3b

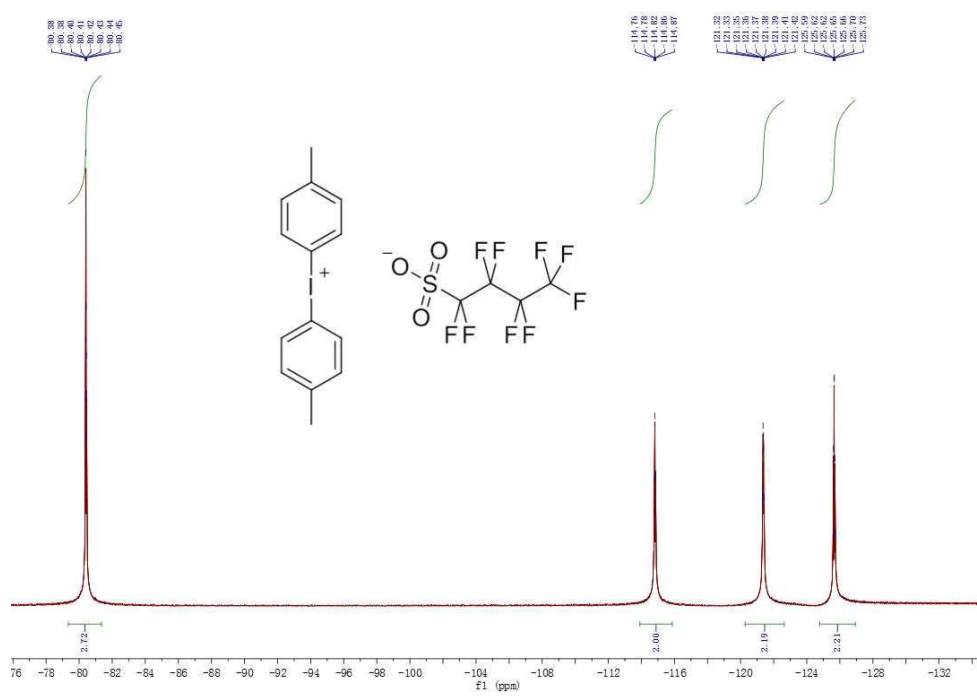

<sup>19</sup>F NMR spectra of PAG2-3b

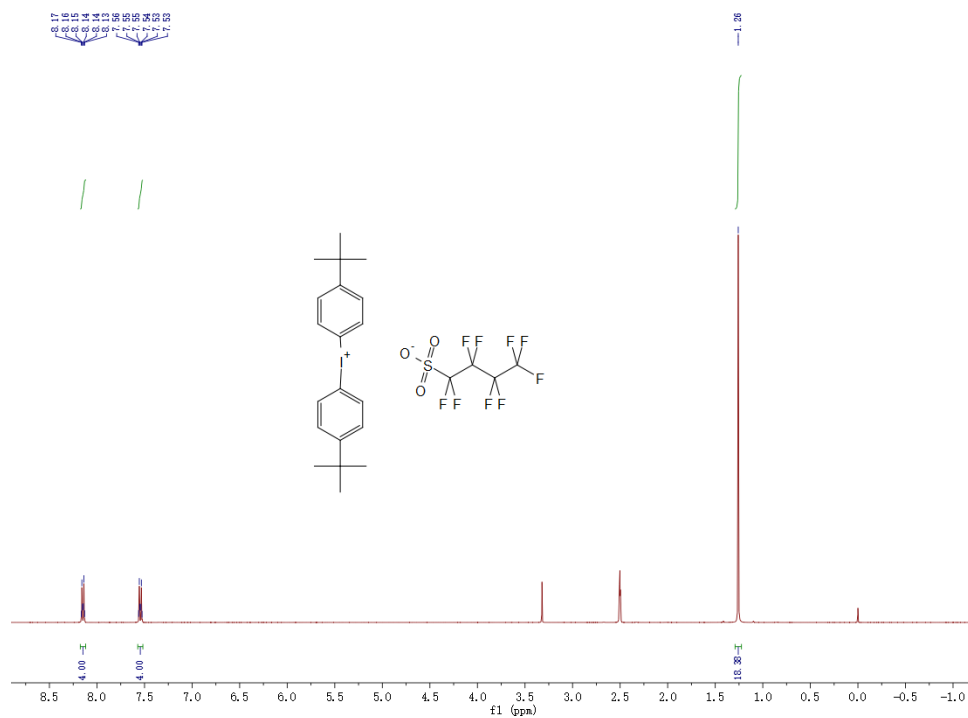

<sup>1</sup>H NMR spectra of PAG3-3b

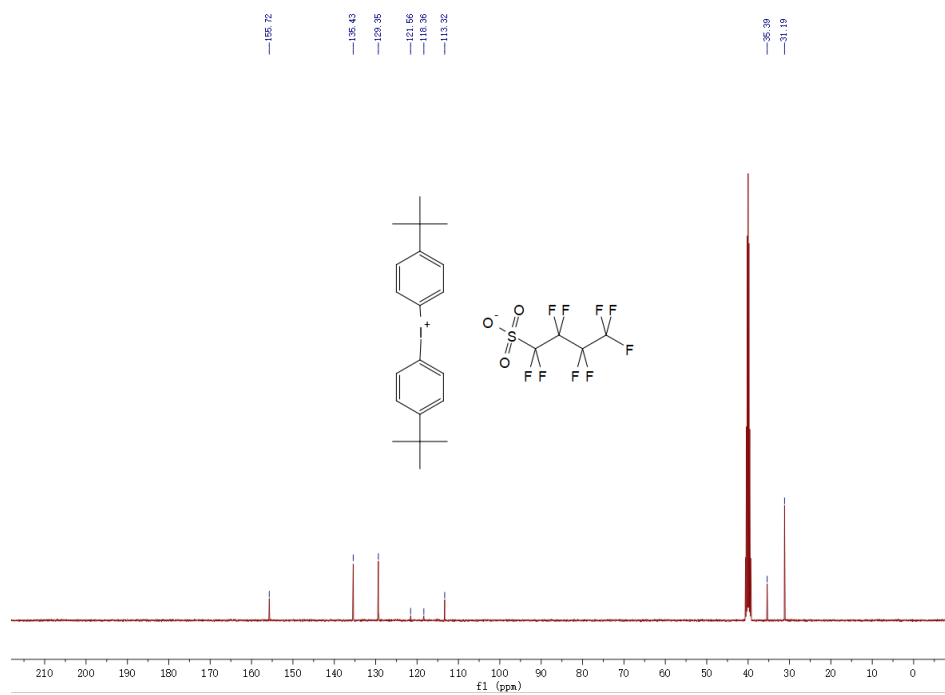

<sup>13</sup>C NMR spectra of PAG3-3b



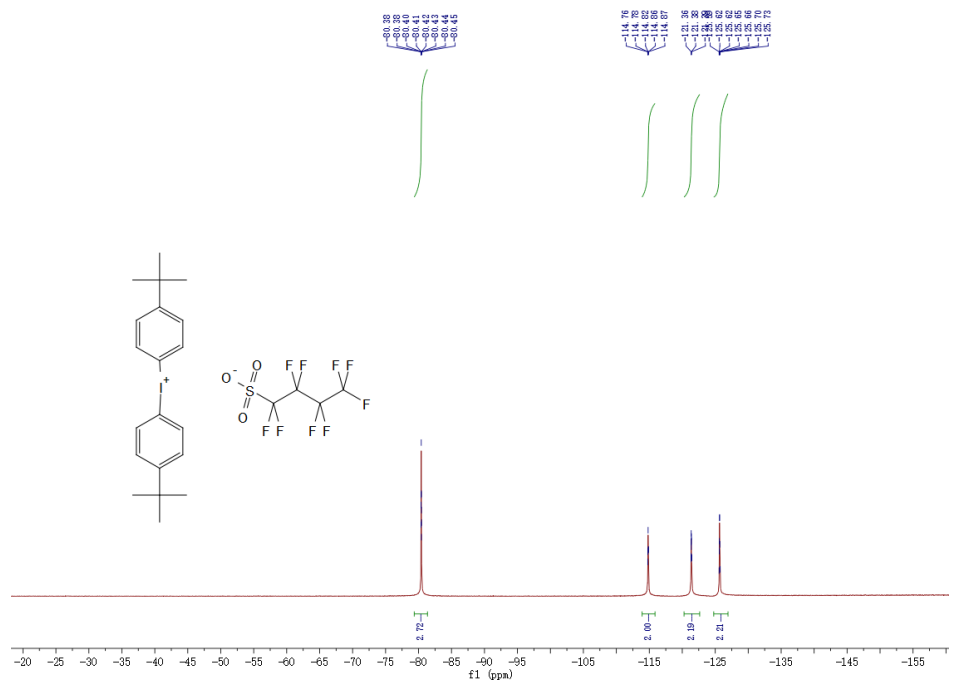

<sup>19</sup>F NMR spectra of PAG3-3b

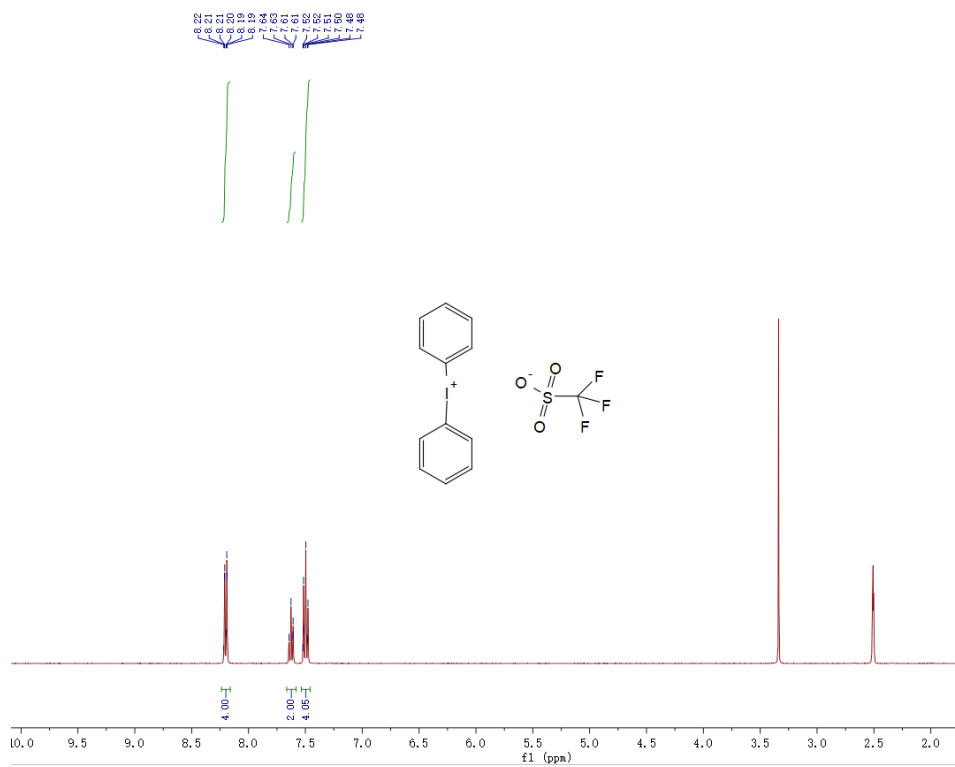

<sup>1</sup>H NMR spectra of PAG1-3c

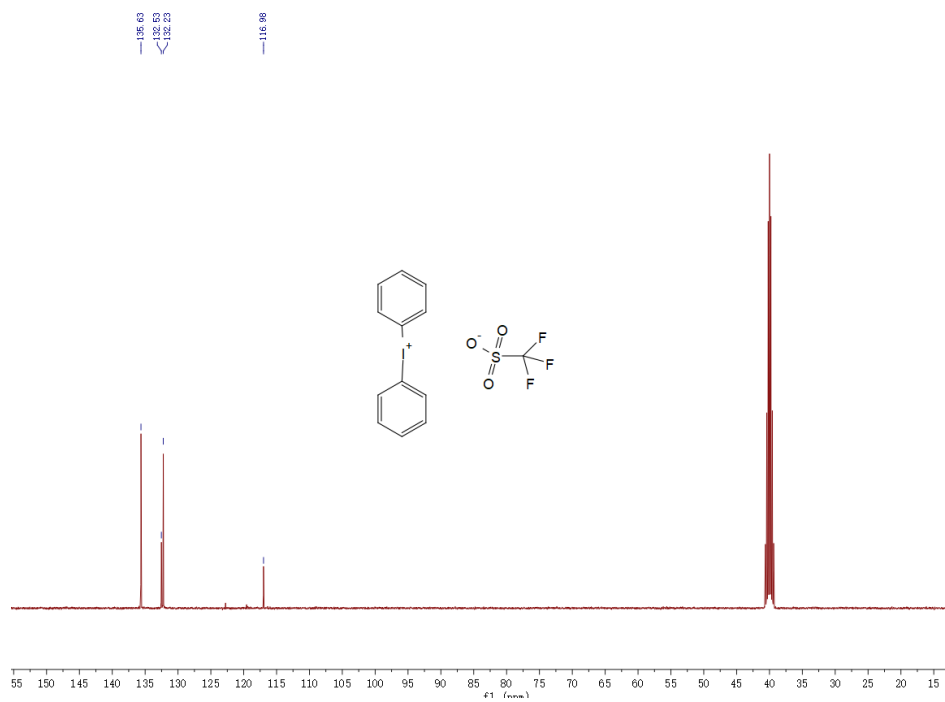

<sup>13</sup>C NMR spectra of PAG1-3c

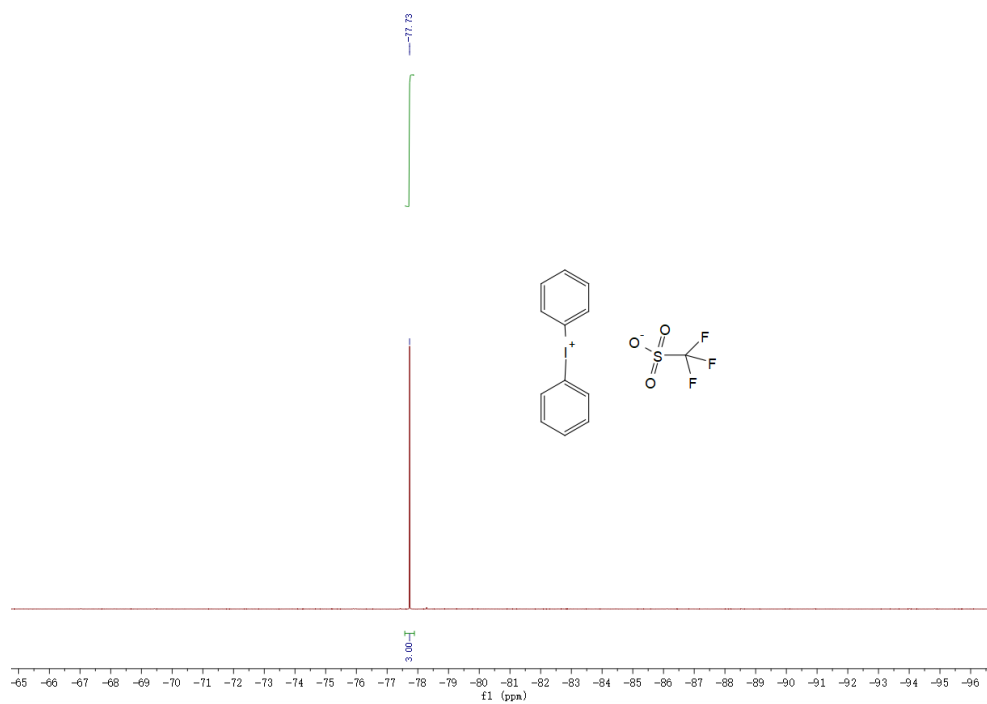

<sup>19</sup>F NMR spectra of PAG1-3c

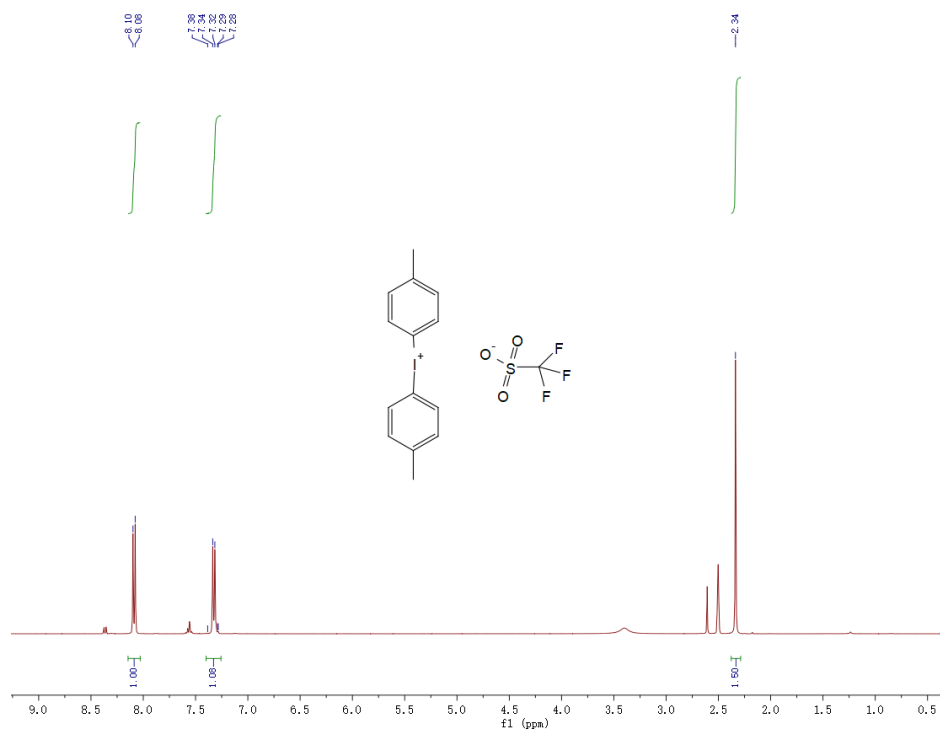

<sup>1</sup>H NMR spectra of PAG2-3c

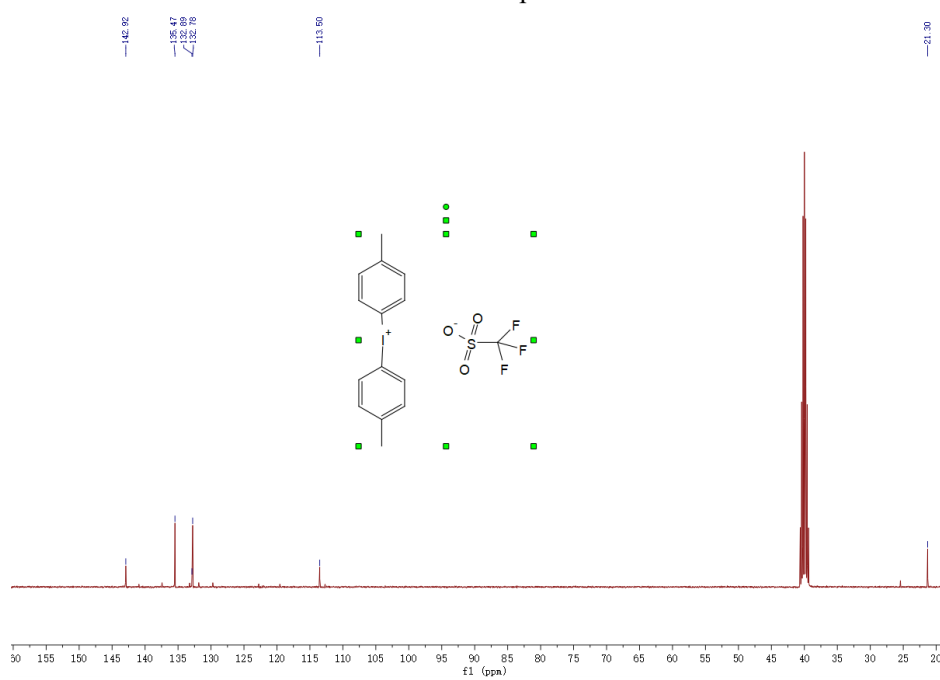

<sup>13</sup>C NMR spectra of PAG2-3c

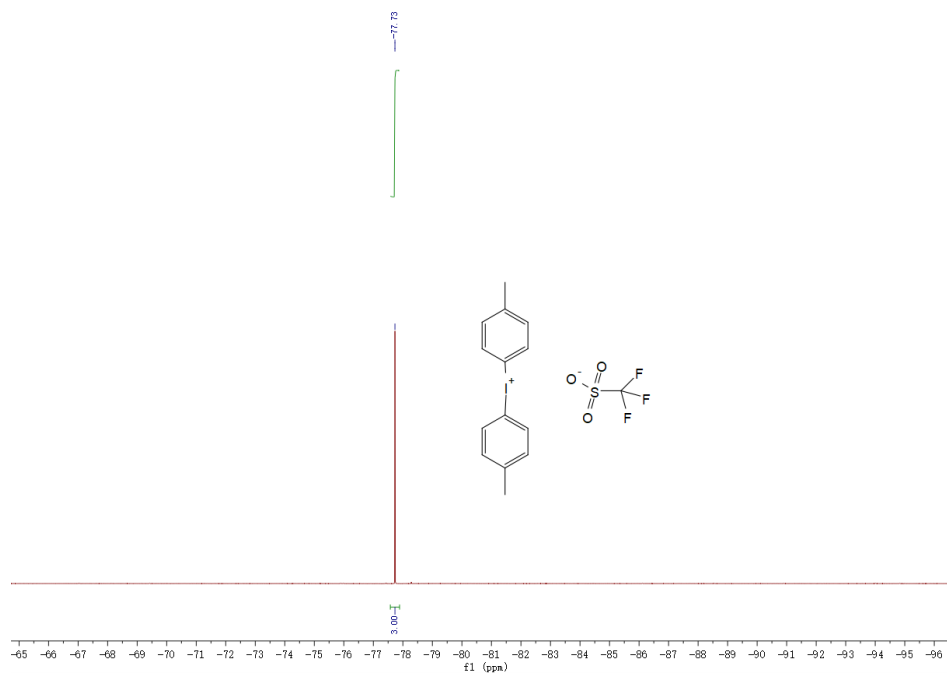

$^{19}\text{F}$  NMR spectra of PAG2-3c

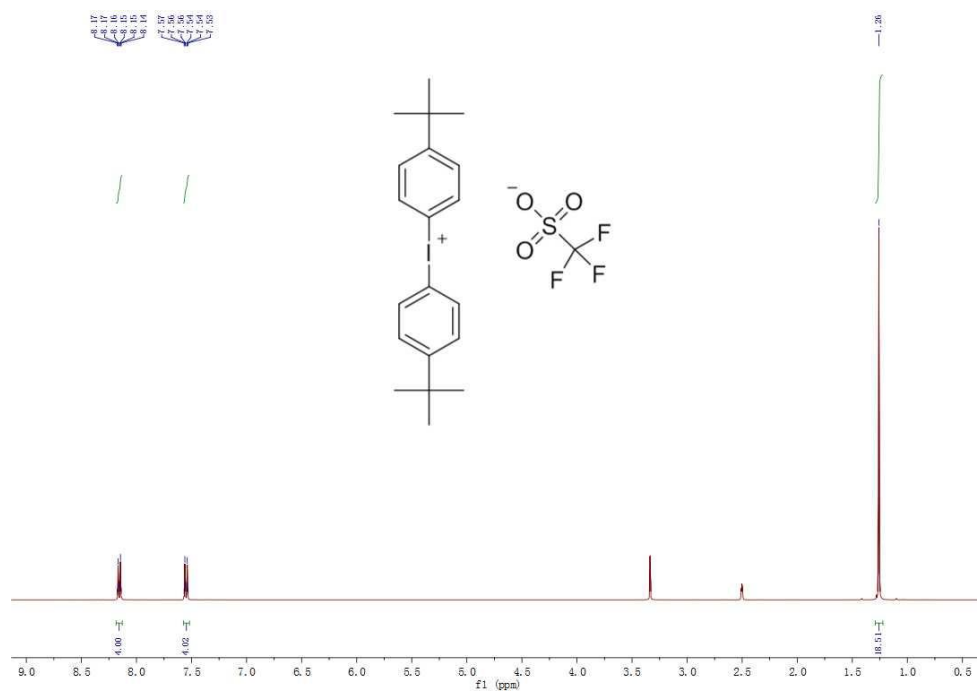

$^1\text{H}$  NMR spectra of PAG3-3c

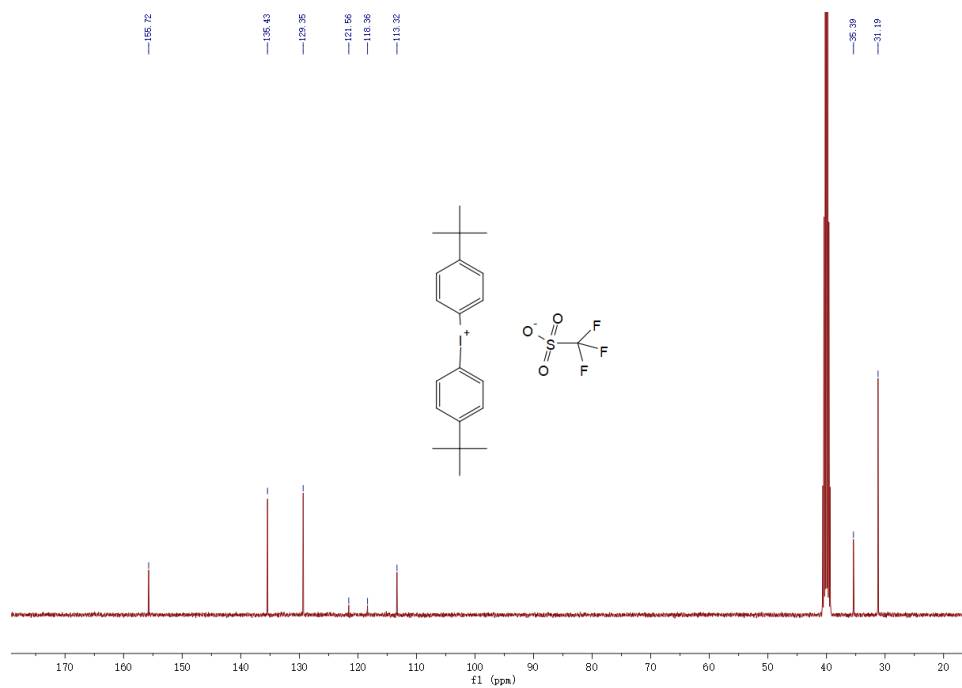

<sup>13</sup>C NMR spectra of PAG3-3c

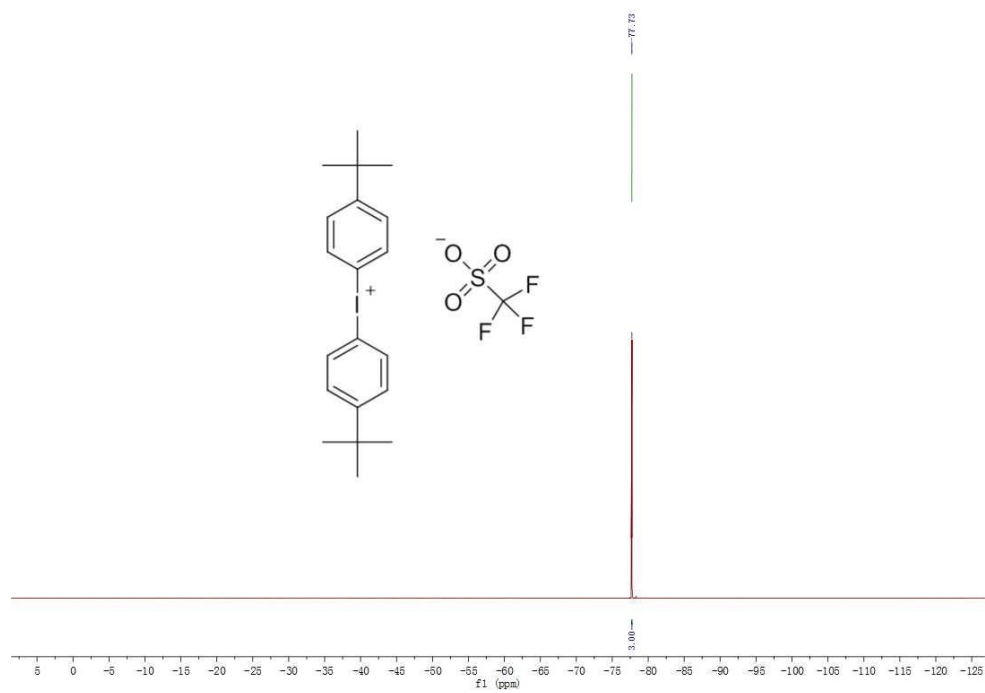

<sup>19</sup>F NMR spectra of PAG3-3c
